# Supplementary material
Source: PubMed Central journal article supplement (PMC5698099)
Supplement: NIHMS907097-supplement-1.pdf [file NIHMS907097-supplement-1.pdf]

## SUPPLEMENTARY INFORMATION

### **A CRISPR screen identifies a pathway required for paraquat-induced cell death.**

Colleen R. Reczek<sup>1</sup>, Kıvanç Birsoy<sup>2</sup>, Hyewon Kong<sup>1</sup>, Inmaculada Martínez-Reyes<sup>1</sup>,  
Tim Wang<sup>3,4,5,6</sup>, Peng Gao<sup>7</sup>, David M. Sabatini<sup>3,4,5,6</sup>, Navdeep S. Chandel<sup>8\*</sup>

<sup>1</sup>Department of Medicine, Northwestern University Feinberg School of Medicine, Chicago, IL 60611, USA.

<sup>2</sup>Laboratory of Metabolic Regulation and Genetics, The Rockefeller University, New York, NY 10065, USA.

<sup>3</sup>Whitehead Institute for Biomedical Research, Department of Biology, Massachusetts Institute of Technology, Cambridge, MA 02142, USA.

<sup>4</sup>Howard Hughes Medical Institute, Department of Biology, Massachusetts Institute of Technology, Cambridge, MA 02139, USA.

<sup>5</sup>Koch Institute for Integrative Cancer Research, Massachusetts Institute of Technology, Cambridge, MA 02139, USA.

<sup>6</sup>Broad Institute of Harvard and Massachusetts Institute of Technology, Cambridge, MA 02142, USA.

<sup>7</sup>Metabolomics Core Facility, Northwestern University Robert H. Lurie Comprehensive Cancer Center, Chicago, IL 60611, USA.

<sup>8</sup>Department of Medicine, Northwestern University Feinberg School of Medicine, Chicago, IL 60611, USA.

\*Corresponding author:

Navdeep S. Chandel

Northwestern University  
Feinberg School of Medicine  
McGaw Pavilion, Rm. M-334  
240 East Huron Street  
Chicago, IL 60611  
Phone: 312-503-2549  
E-mail: nav@northwestern.edu

## Supplementary Results

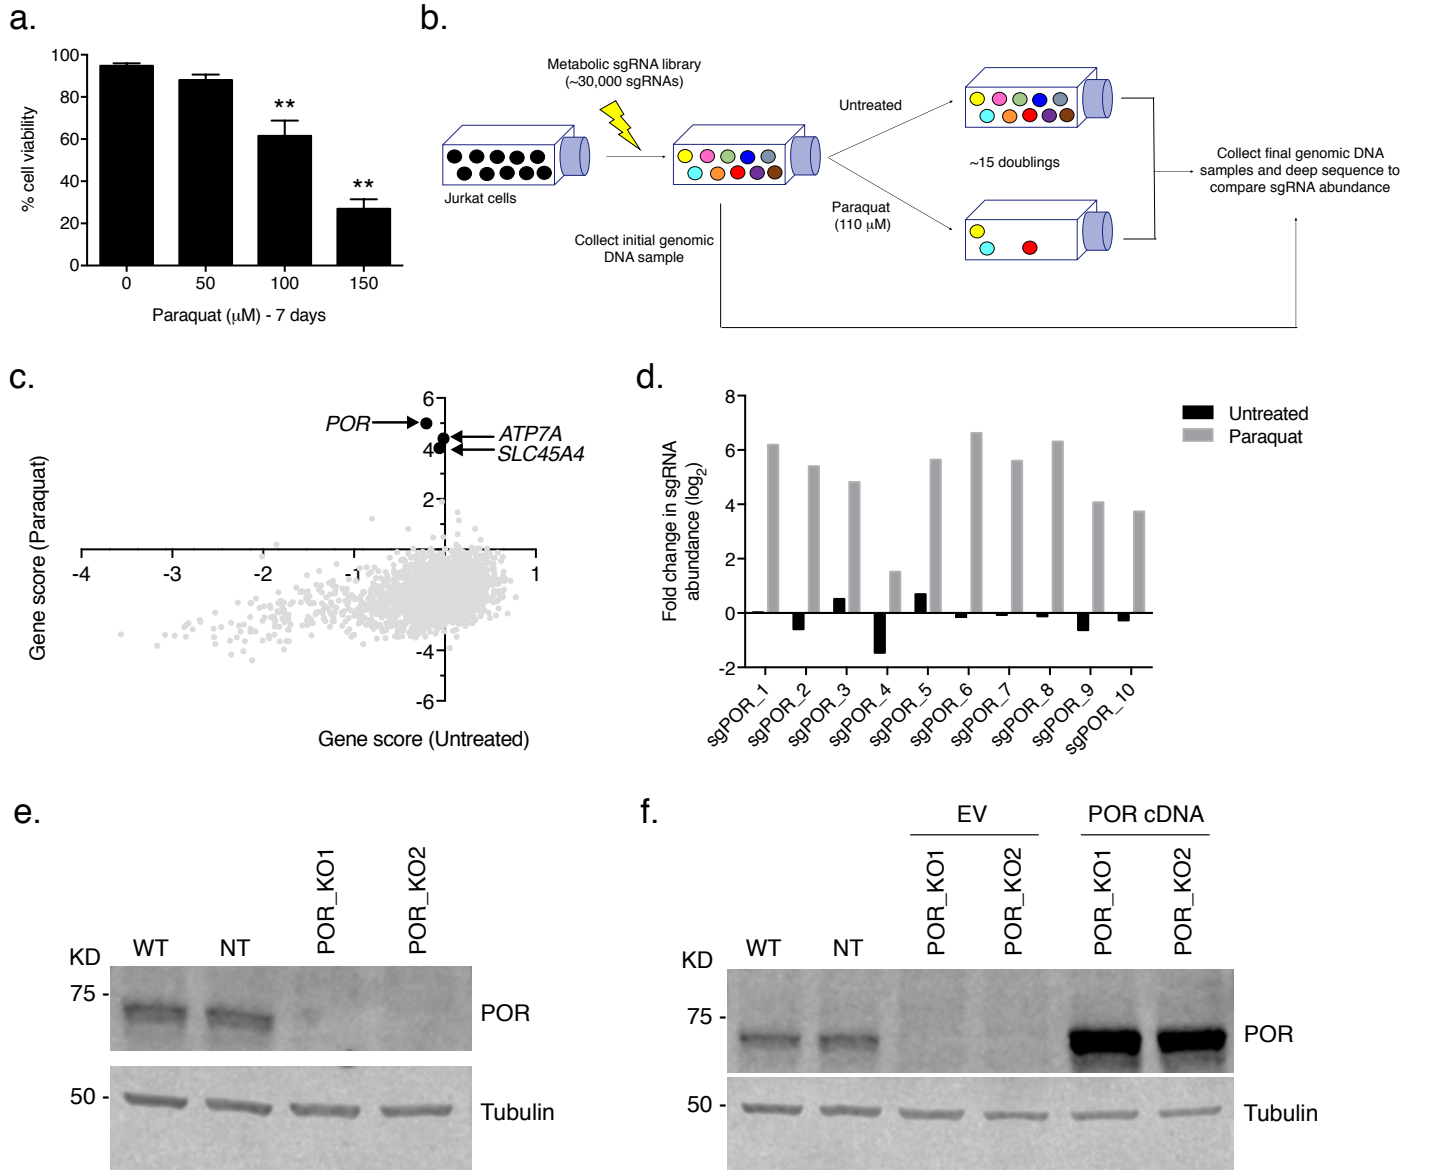

### Supplementary Figure 1. Paraquat (PQ) positive selection CRISPR-based screen.

(a) Concentration-dependent effects of PQ on wildtype Jurkat cell viability. Mean  $\pm$  SEM ( $n=4$  independent experiments). \*\* indicates significance  $p < 0.01$  compared to the  $0 \mu\text{M}$  PQ condition. (b) Schematic of the PQ positive selection CRISPR-based screen. (c) A dot plot showing the post-screen median  $\log_2$  fold change in the abundance of all single guide RNAs (sgRNAs) targeting a particular gene (termed gene score) in untreated versus PQ-treated ( $110 \mu\text{M}$  PQ) Jurkat cells. The gene scores for *POR*, *ATP7A*, and *SLC45A4* are indicated. Most genes, as well as non-targeting control sgRNAs, have a negative score after treatment with PQ. (d) Post-positive selection screen changes in the abundance of individual sgRNAs targeting the highest scoring gene *POR* in the presence or absence of PQ. (e) Representative western blot analysis of *POR* protein levels in wildtype (WT) Jurkat cells as well as clonal non-targeting (NT) and *POR*-null Jurkat cells (sgPOR\_1 and sgPOR\_8 from Supplementary Fig. 1d) were used to generate the *POR\_KO1* and *POR\_KO2* clones, respectively). Tubulin was used as a loading control. (f) Representative western blot analysis of *POR* protein levels in two *POR*-null Jurkat clones stably transfected with either empty vector (EV) or human *POR* cDNA. The corresponding full, uncut gel images are shown in Supplementary Figure 8.

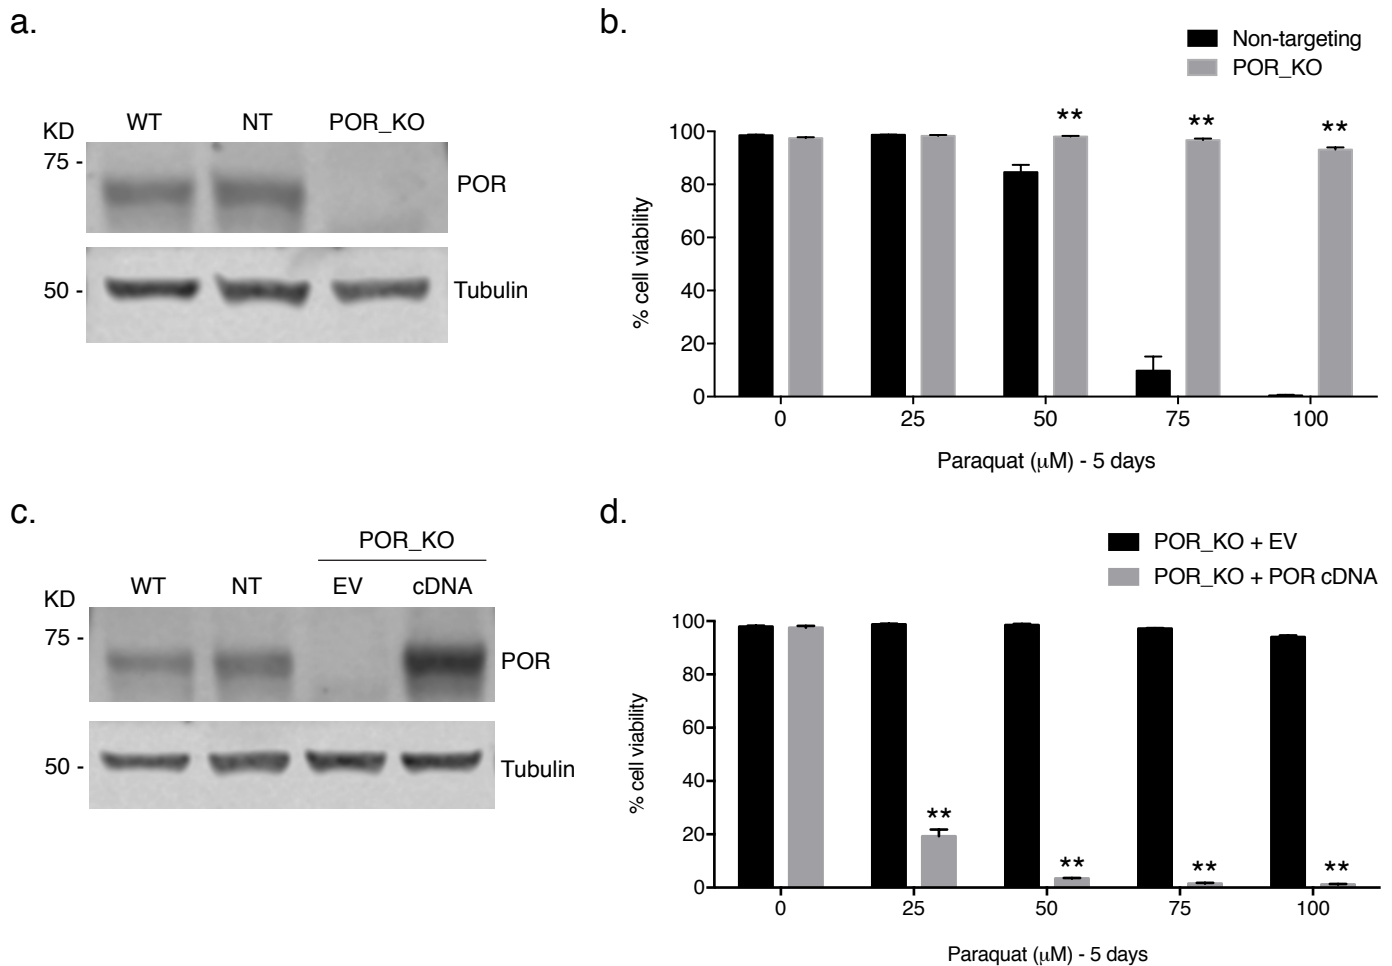

## Supplementary Figure 2. Validation of the paraquat (PQ) positive selection CRISPR-based screen in A549 cells.

(a) Representative western blot analysis of POR protein levels in wildtype (WT) A549 cells as well as clonal non-targeting (NT) and POR-null A549 cells (sgPOR\_6 from Supplementary Fig. 1d was used to generate the POR\_KO A549 clone shown). (b) Non-targeting control and POR-null A549 cells were treated with the indicated concentrations of PQ for 5 days and live cell viability was assessed. (c) Representative western blot analysis of POR protein levels in POR-null A549 cells stably transfected with either empty vector (EV) or human POR cDNA. (d) EV- and POR cDNA-reconstituted POR-null A549 cells were treated with PQ for 5 days and live cell viability was determined. For Supplementary Figure 2a and 2c, the corresponding full, uncut gel images are shown in Supplementary Figure 9. For Supplementary Figure 2b and 2d, mean  $\pm$  SEM (n=4 independent experiments) and \*\* indicates significance  $p < 0.01$  compared to control cells.

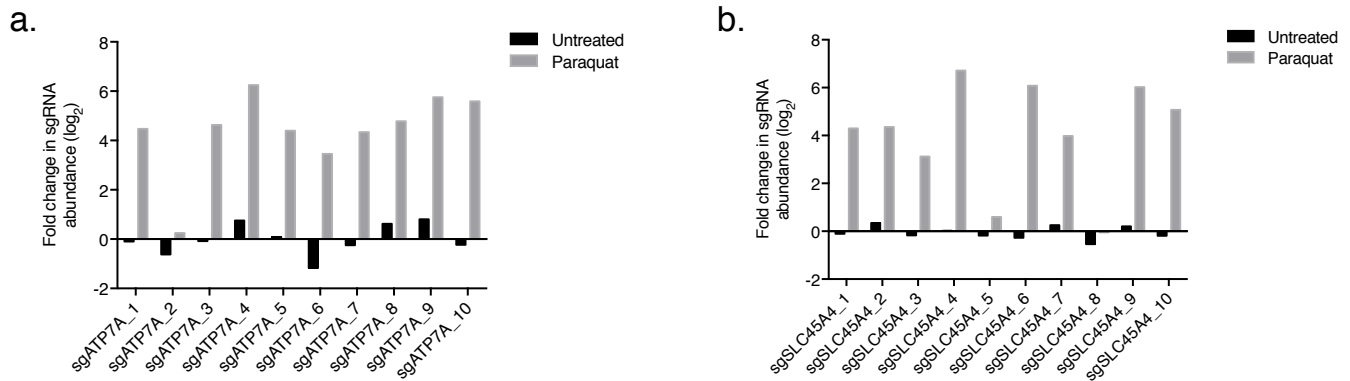

**c.**

**WT and NT ATP7A**

5'-ATGGTTATGGACCACCCTTTGCAACTCTTCACCATAAT-3'  
 3'-TACCAATACCTGGTGGTGAACGTTGAGAAGTGGTATTA-5'  
 PAM *sgATP7A\_3*

**ATP7A\_KO**  
**Allele 1 and Allele 2**

5'-ATGGTTATGGACCACCCTTTGCAACTCTTCACCATAAT-3'  
 3'-TACCAATACCTGGTGGGAAACGTTGAGAAGTGGTATTA-5'

5'-A-3' 1 bp deletion  
 3'-T-5' Δ base pair 2030

Stop codon introduced

**d.**

**WT and NT SLC45A4**

5'-CTGAGCCCCATCCTTGGCTCATCTTCACACCTCTCATT-3'  
 3'-GACTCGGGGTAGGAACCGGAGTAGAAGTGTGGAGAGTAA-5'  
 PAM *sgSLC45A4\_2*

**SLC45A4\_KO**

**Allele 1**

5'-CTGAGCCCTCATCTTCACACCTCTCATT-3'  
 3'-GACTCGGGAGTAGAAGTGTGGAGAGTAA-5'

5'-CATCCTTGGCC-3' 11 bp deletion  
 3'-GTAGGAACCGG-5' Δ base pairs 132-142

Stop codon introduced

**Allele 2**

5'-CTGAGCCCCATCCTTGGCTCATCTTCACACCTCTCATT-3'  
 3'-GACTCGGGGTAGGAACCGGAGTAGAAGTGTGGAGAGTAA-5'

5'-C-3' 1 bp deletion  
 3'-G-5' Δ base pair 141

Stop codon introduced

**Supplementary Figure 3. Generation of ATP7A-null and SLC45A4-null Jurkat cells.**

(a) Post-positive selection screen changes in the abundance of individual sgRNAs targeting the second highest scoring gene *ATP7A* in the presence or absence of PQ. (b) Post-positive selection screen changes in the abundance of individual sgRNAs targeting the third highest scoring gene *SLC45A4* in the presence or absence of PQ. (c) A portion of the wildtype (WT) and non-targeting (NT) *ATP7A* sequence is shown as well as the sequence of the mutant alleles of the *ATP7A*-null clone *ATP7A\_KO*. CRISPR-mediated targeting of *ATP7A* with *sgATP7A\_3* (black bolded and italicized sequence; Supplementary Fig. 3a) generated a homozygous knockout. Both alleles contain the same single base pair (bp) deletion (shown in gray). This deletion causes a frameshift and introduces a stop codon just downstream, generating a truncated protein. (d) A portion of the wildtype (WT) and non-targeting (NT) *SLC45A4* sequence is shown as well as the corresponding sequence of the mutant alleles of the *SLC45A4*-null clone *SLC45A4\_KO*. CRISPR-mediated targeting of *SLC45A4* with *sgSLC45A4\_2* (black bolded and italicized sequence; Supplementary Fig. 3b) generated a homozygous knockout. One allele contains an 11 base pair (bp) deletion (shown in gray) while the second allele contains a single bp deletion (shown in gray italics). Both deletions cause a frameshift and introduce a stop codon just downstream, generating a truncated protein. For Supplementary Figure 3c and 3d, the protospacer adjacent motif (PAM) sequence (black italics) and the Cas9 cut site (vertical black dashed line) are also shown.

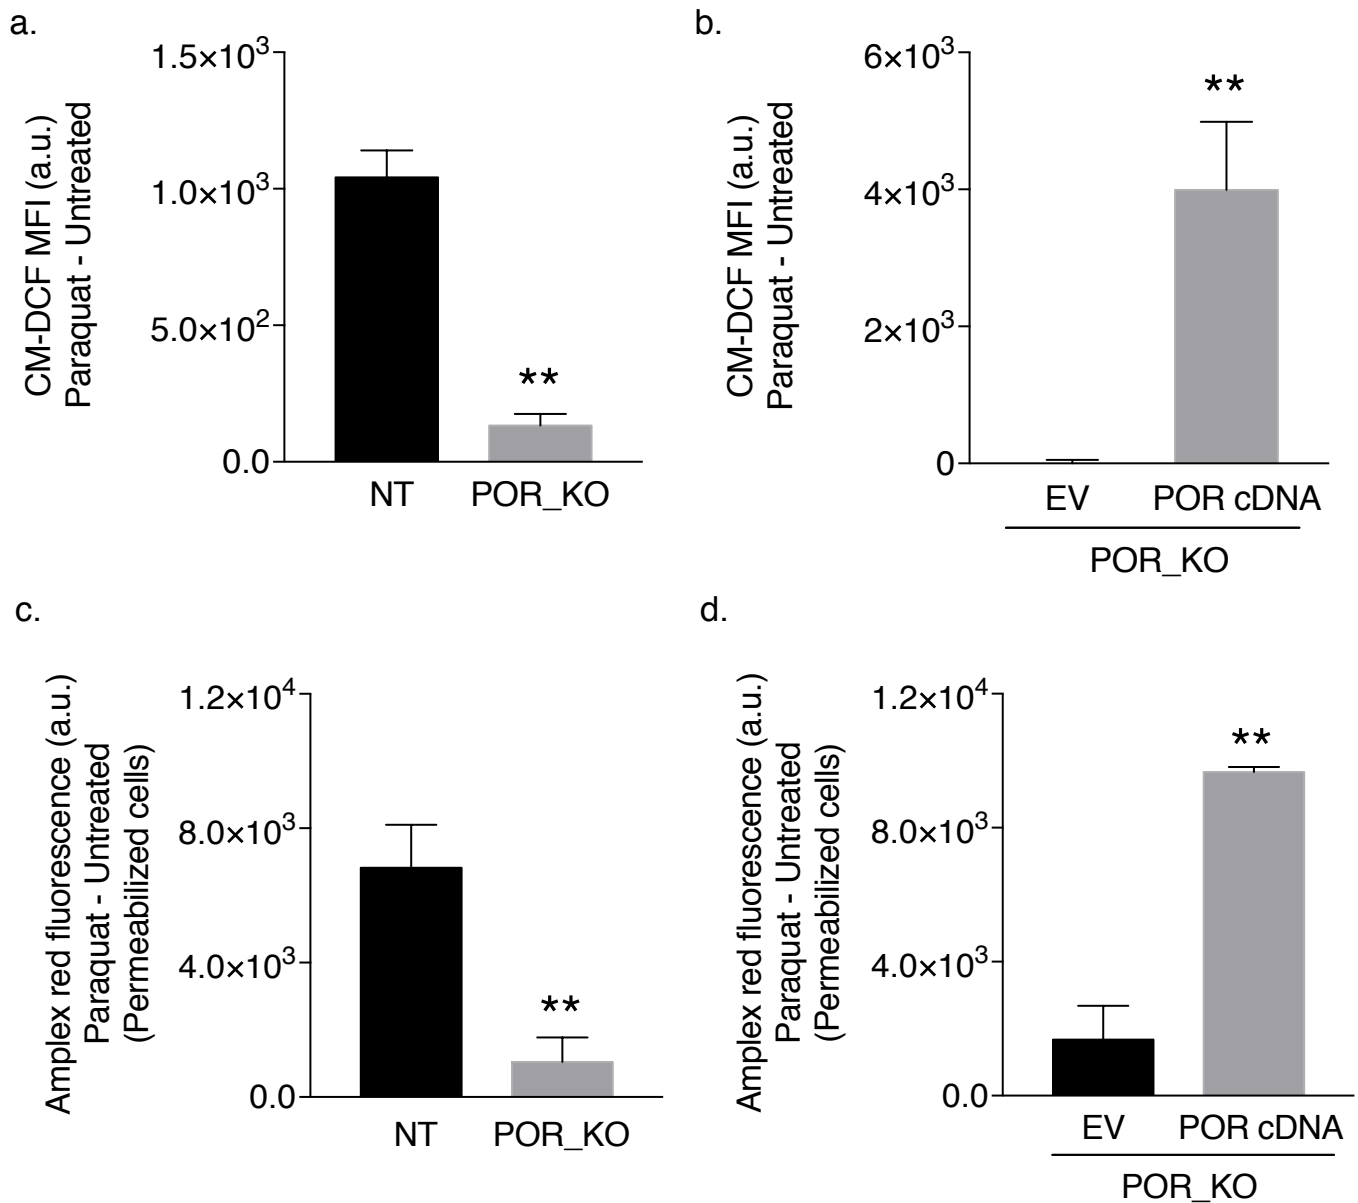

**Supplementary Figure 4. POR is necessary for paraquat (PQ)-induced cytosolic ROS generation in A549 cells.**

(a) Non-targeting (NT) control and clonal POR-null A549 cells were treated with 100  $\mu$ M PQ for 48 hours and intracellular ROS levels were determined by flow cytometry and are presented as the mean fluorescence intensity (MFI) of CM-DCF. (b) Oxidation of CM-H2DCFDA was used to measure intracellular ROS in EV- and POR cDNA-reconstituted POR-null A549 cells treated with 25  $\mu$ M PQ for 48 hours. (c) Amplex red was used to measure intracellular H<sub>2</sub>O<sub>2</sub> production in saponin-permeabilized non-targeting (NT) control and clonal POR-null A549 cells treated with 100  $\mu$ M PQ for 1 hour. (d) Intracellular H<sub>2</sub>O<sub>2</sub> levels were measured by Amplex red in saponin-permeabilized clonal POR-null A549 cells reconstituted with either EV or POR cDNA following treatment with 100  $\mu$ M PQ for 1 hour. Throughout Supplementary Figure 4, mean  $\pm$  SEM (n=4 independent experiments) and \*\* indicates significance p < 0.01 compared to control cells. Data were background corrected to the mean value in untreated cells.

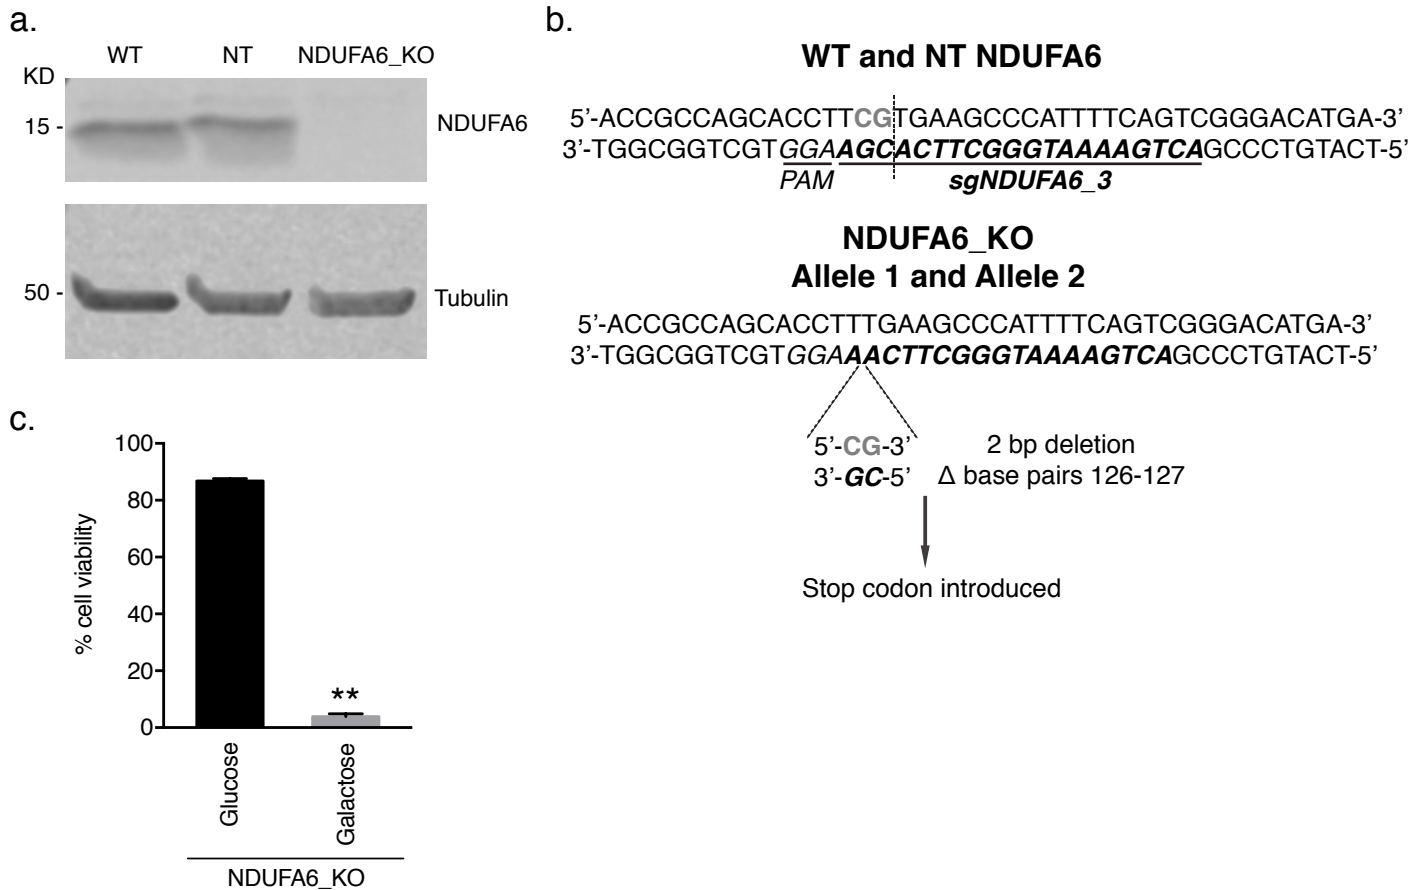

### Supplementary Figure 5. Generation of NDUFA6-null Jurkat cells.

(a) Representative western blot analysis of NDUFA6 protein levels in wildtype (WT) Jurkat cells as well as clonal non-targeting (NT) and NDUFA6-null Jurkat cells (NDUFA6\_KO clone). Tubulin was used as a loading control. Note, NDUFA6 is a subunit of mitochondrial complex I. The corresponding full, uncut gel image is shown in Supplementary Figure 10. (b) A portion of the wildtype (WT) and non-targeting (NT) NDUFA6 sequence is shown as well as the corresponding sequence of the mutant alleles of the NDUFA6-null clone NDUFA6\_KO. CRISPR-mediated targeting of NDUFA6 with sgNDUFA6\_3 (black bolded and italicized sequence) generated a homozygous knockout. Both alleles contain the same two base pair (bp) deletion (shown in gray). This deletion causes a frameshift and introduces a stop codon just downstream, generating a truncated protein. The protospacer adjacent motif (PAM) sequence (black italics) and the Cas9 cut site (vertical black dashed line) are also shown. (c) Clonal NDUFA6-null Jurkat cells (NDUFA6\_KO) were cultured in media containing either 11.1 mM glucose or 11.1 mM galactose supplemented with 1 mM methyl pyruvate for 4 days and live cell viability was assessed. Mean  $\pm$  SEM (n=4 independent experiments) and \*\* indicates significance  $p < 0.01$  compared to control cells.

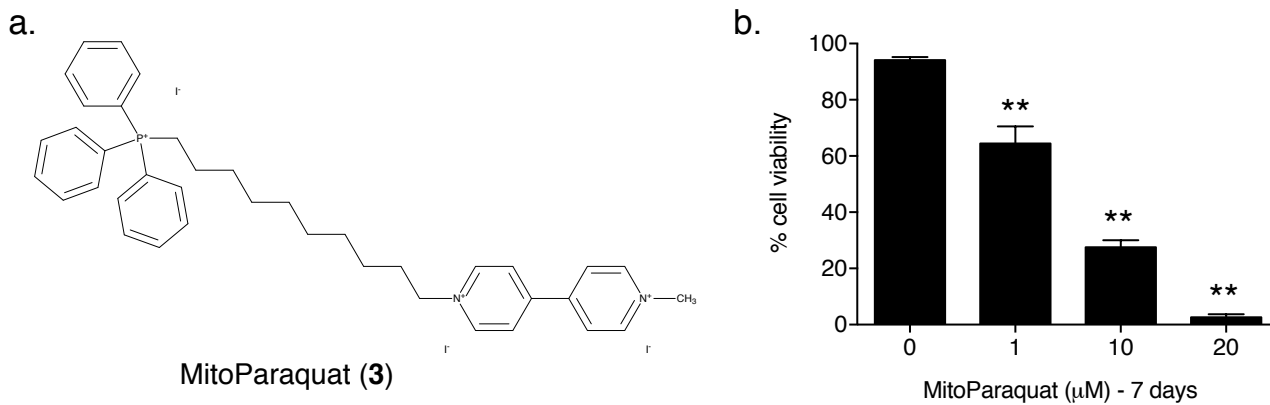

**Supplementary Figure 6. Mitochondrial-targeted paraquat (MitoPQ) induces cell death.**

(a) Structure of mitochondrial-targeted paraquat (MitoParaquat; MitoPQ). (b) Concentration-dependent effects of MitoPQ on non-targeting control Jurkat cell viability. Mean  $\pm$  SEM (n=4 independent experiments) and \*\* indicates significance  $p < 0.01$  compared to control cells.

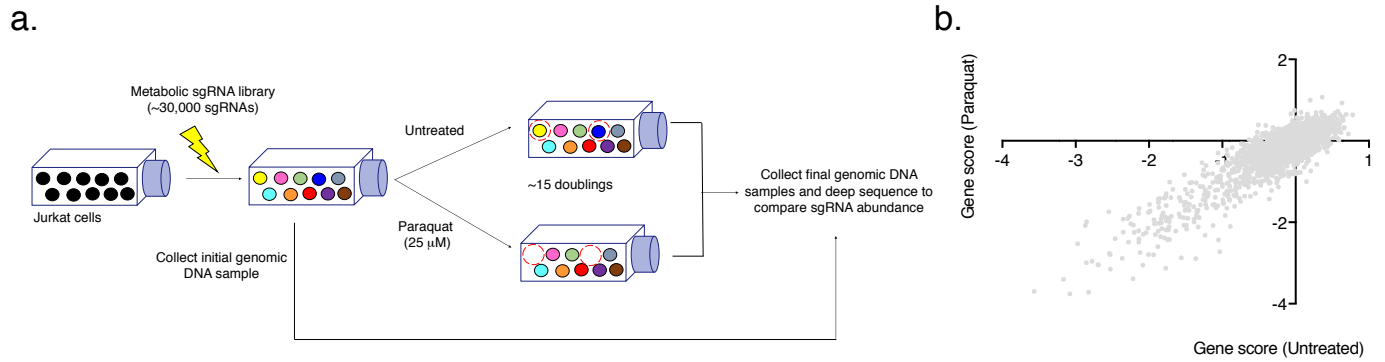

### Supplementary Figure 7. Paraquat (PQ) negative selection CRISPR-based screen.

(a) Schematic of the PQ negative selection CRISPR-based screen. (b) A dot plot showing the post-screen median  $\log_2$  fold change in the abundance of all sgRNAs targeting a particular gene (termed gene score) in untreated versus PQ-treated (25  $\mu$ M PQ) Jurkat cells.



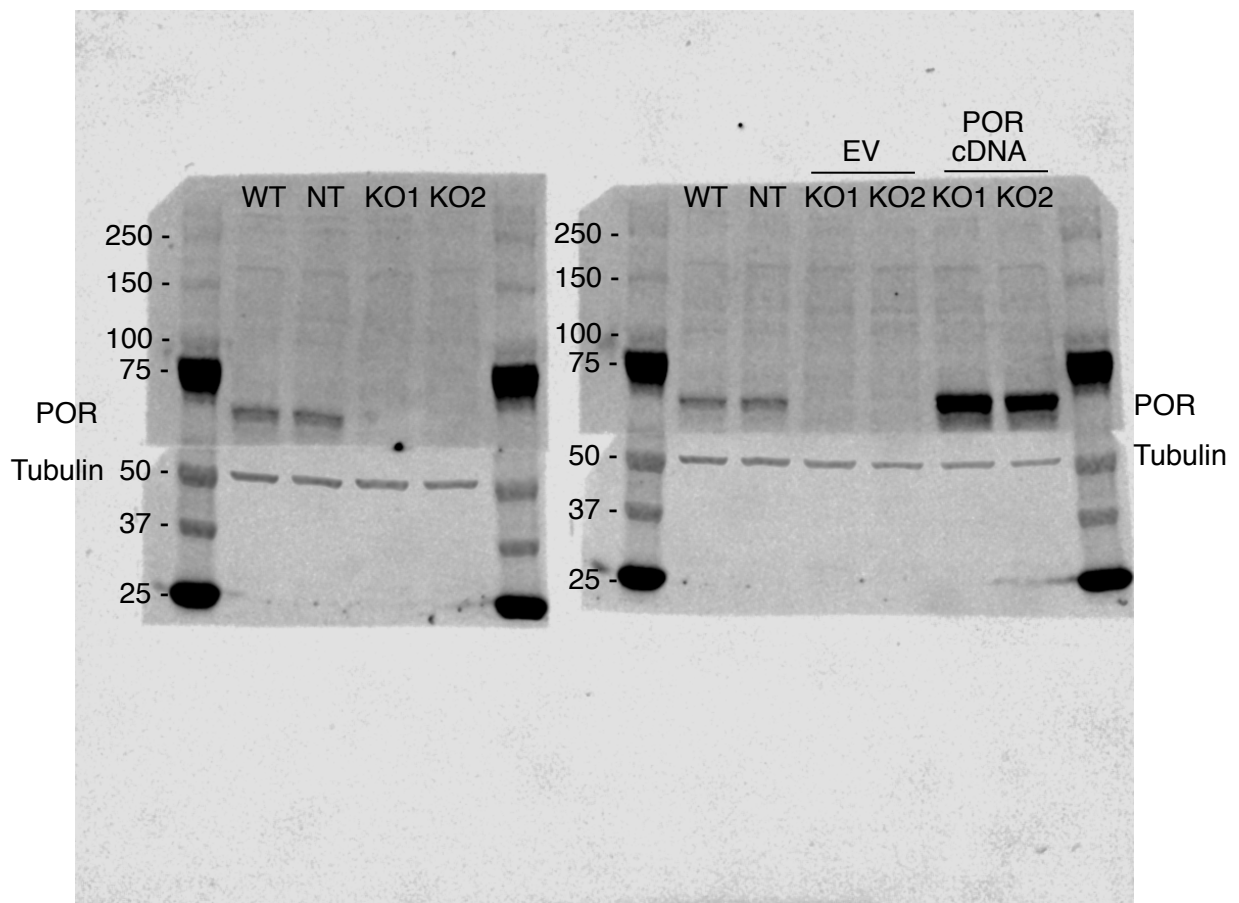

**Supplementary Figure 8. Original western blot for Supplementary Figure 1e and 1f.**

The full, uncut gel images of Supplementary Figure 1e (left) and Supplementary Figure 1f (right) are shown.

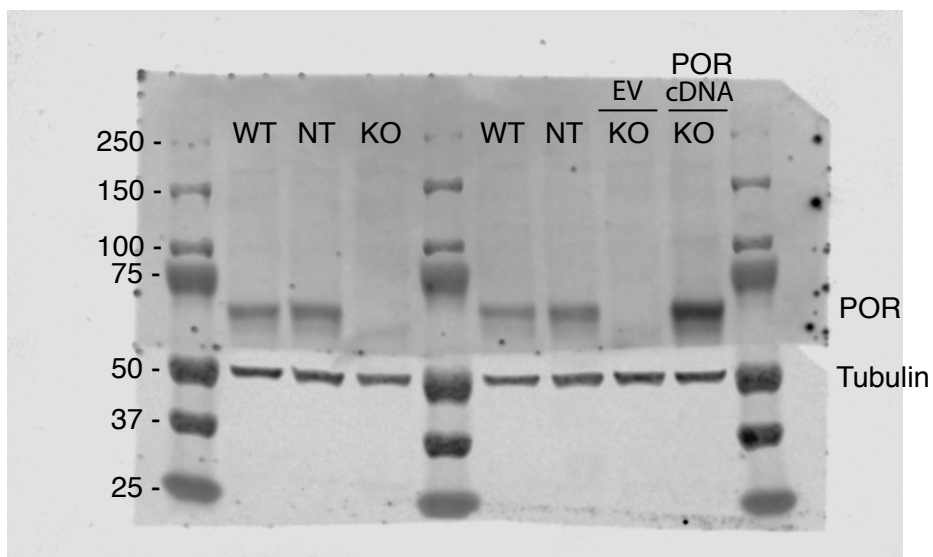

**Supplementary Figure 9. Original western blot for Supplementary Figure 2a and 2c.**

The full, uncut gel images of Supplementary Figure 2a (left) and Supplementary Figure 2c (right) are shown.

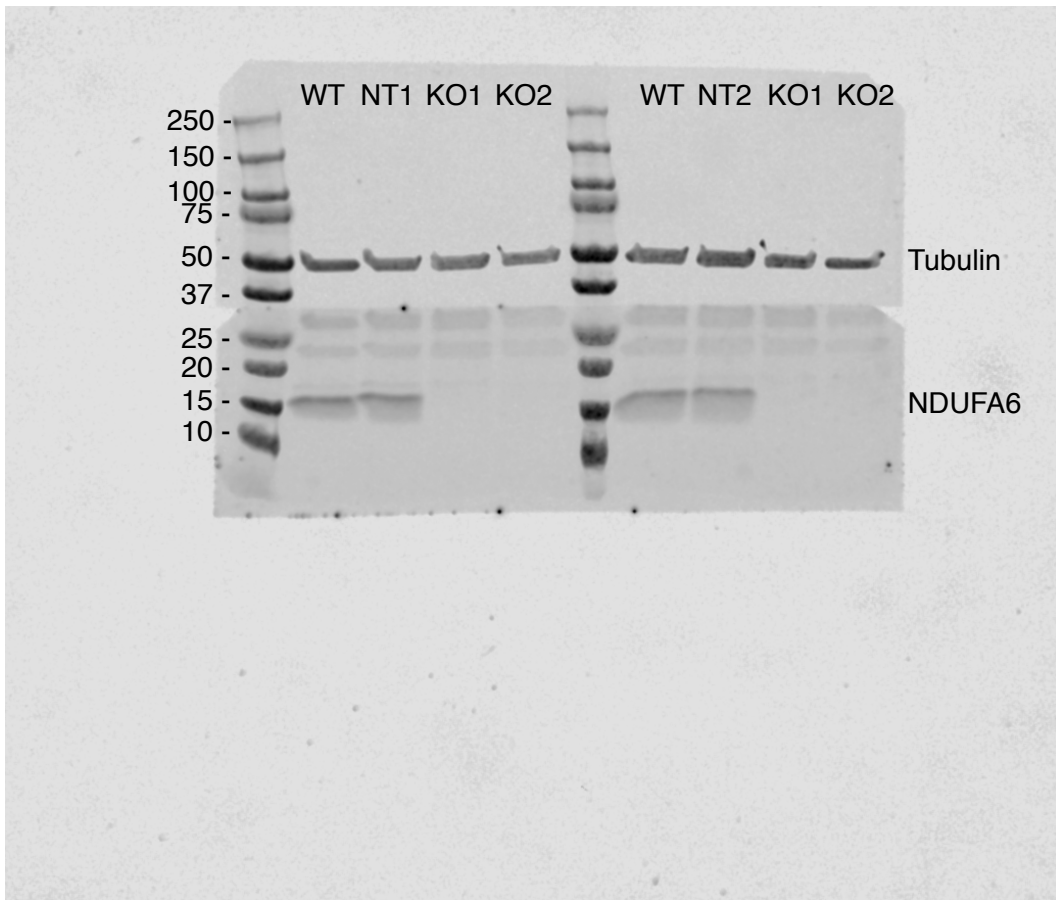

**Supplementary Figure 10. Original western blot for Supplementary Figure 5a.**

The full, uncut gel image of Supplementary Figure 5a (left) is shown. Note, NT1 and KO1 as labeled here are the clonal NT and NDUFA6\_KO Jurkat cell lines, respectively, used throughout this study.

| sgRNA ID        | Strand | Sequence             |
|-----------------|--------|----------------------|
| sgPOR_1         | -      | GCTGCTCTCTCTGACAGAGG |
| sgPOR_6         | +      | CAACATGGGAGACTCCCACG |
| sgPOR_8         | -      | TGCCTCGCATCCCGTAGCGG |
| sgATP7A_3       | -      | GGTGAAGAGTTGCAAAGTGG |
| sgSLC45A4_2     | +      | GAGGTGTGAAGATGAGGCCA |
| sgNDUFA6_3      | +      | ACTGAAAATGGGCTTCACGA |
| sgNon-targeting | NA     | GTAGCGAACGTGTCCGGCGT |

| sgRNA Oligonucleotide ID | Sequence                       |
|--------------------------|--------------------------------|
| sgPOR_1 F                | 5'-caccgGCTGCTCTCTCTGACAGAGG   |
| sgPOR_1 R                | 5'-aaacCCTCTGTGTCAGAGAGAGCAGCc |
| sg POR_6 F               | 5'- caccgCAACATGGGAGACTCCCACG  |
| sg POR_6 R               | 5'- aaacCGTGGGAGTCTCCCATGTTGc  |
| sgPOR_8 F                | 5'- caccgTGCCTCGCATCCCGTAGCGG  |
| sgPOR_8 R                | 5'- aaacCCGCTACGGGATGCGAGGCAc  |
| sgATP7A_3 F              | 5'- caccgGGTGAAGAGTTGCAAAGTGG  |
| sgATP7A_3 R              | 5'- aaacCCACTTTGCAACTCTTCACCCc |
| sgSLC45A4_2 F            | 5'- caccgGAGGTGTGAAGATGAGGCCA  |
| sgSLC45A4_2 R            | 5'- aaacTGGCCTCATCTTCACACCTCc  |
| sgNDUFA6_3 F             | 5'- caccgACTGAAAATGGGCTTCACGA  |
| sgNDUFA6_3 R             | 5'- aaacTCGTGAAGCCCATTTTCAGTc  |
| sgNon-targeting F        | 5'- caccgGTAGCGAACGTGTCCGGCGT  |
| sgNon-targeting R        | 5'- aaacACGCCGGACACGTTCGCTACc  |

**Supplementary Table 1. sgRNA and sgRNA oligonucleotide sequences.**

| Oligonucleotide ID | Sequence                                          |
|--------------------|---------------------------------------------------|
| XhoI-POR F         | 5'– TAAGCACTCGAGGCCACCATGATCAACATGGGAGACTCCCACGTG |
| XhoI-POR R         | 5'– TAAGCACTCGAGCTAGCTCCACACGTCCAGGGAGTAG         |
| sgATP7A_3 F        | 5'– TCTGTATTCCTGTAATGGGGCT                        |
| sgATP7A_3 R        | 5'– AGCTGAAAATAAACCTTGCCTG                        |
| sgSLC45A4_2 F      | 5'– AGTCACCGTCCTGCTCTTGT                          |
| sgSLC45A4_2 R      | 5'– TGCCCTCAAGGCAAAAATA                           |
| sgNDUFA6_3 F       | 5'– TAGCCAATGGGAAAAGACATTC                        |
| sgNDUFA6_3 R       | 5'– CCACGTAAGCCGCTACCTC                           |

**Supplementary Table 2. Oligonucleotide sequences.**
